# Supplementary material for: γ-secretase directly sheds the survival receptor BCMA from plasma cells
Source: PubMed Central journal article supplement (PMC4490565; doi:10.1038/ncomms8333), 2015-06-11
Supplement: ncomms8333-s1.pdf [file ncomms8333-s1.pdf]

## Supplementary Figure 1

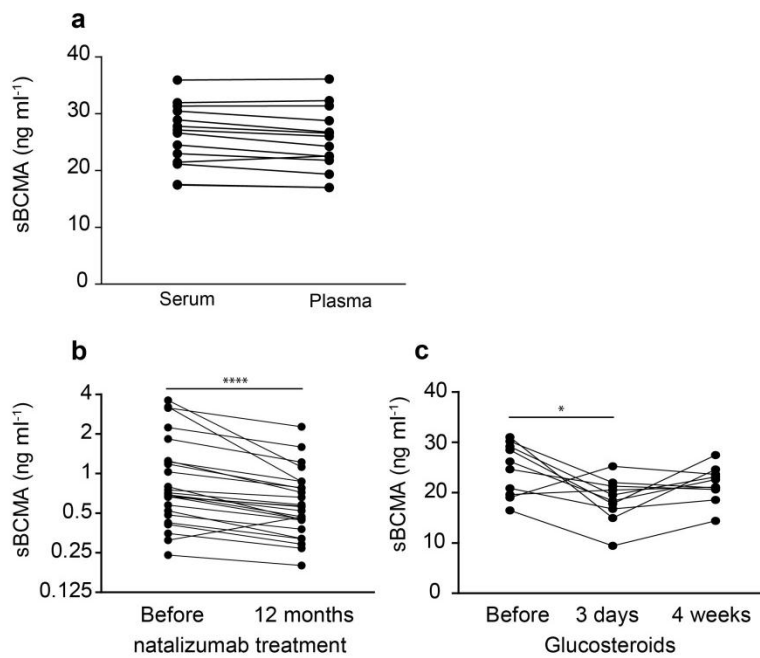

**Supplementary Figure 1. Effects of immunosuppressive treatment on sBCMA levels.** (a) sBCMA levels were measured by ELISA in plasma/serum pairs of 14 healthy controls (b) sBCMA in the CSF of 25 MS patients was determined before and 12 months after natalizumab treatment, which reduced sBCMA levels (\*\*\*\*,  $p < 0.0001$ , Wilcoxon matched-pairs ranked-test). (c) sBCMA levels in the serum of 10 MS patients were determined before, 3 days and 4 weeks after the beginning of high dose glucocorticoid treatment, which reduced sBCMA levels within 3 days (\*,  $p < 0.05$ , Friedman test followed by Dunn's Multiple Comparison Test).

## Supplementary Figure 2

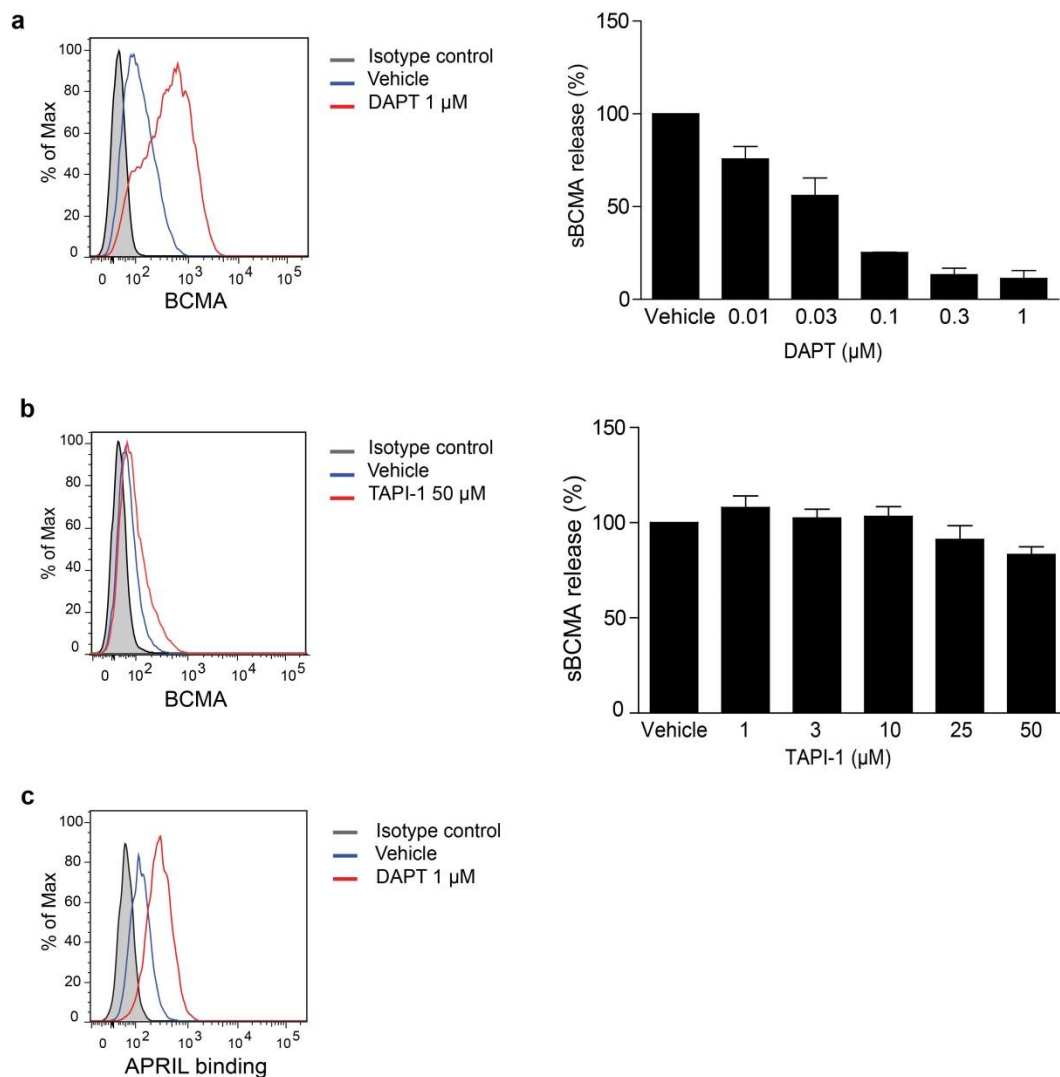

**Supplementary Figure 2.  $\gamma$ -secretase inhibitor DAPT blocks BCMA shedding in plasmacytoma cells resulting in enhanced APRIL-binding.** (a,b) The human plasmacytoma cell line JK-6L was incubated overnight with DAPT or TAPI-1. Surface expression of BCMA was measured by flow cytometry (left panels) and sBCMA in the supernatant was determined by ELISA (right panels). Combined data of 3 independent experiments (mean $\pm$ s.e.m.) (c) BCMA ligand APRIL (FLAG-tagged) was added to plasmacytoma cells after pretreatment with DAPT or vehicle and its binding was analyzed with anti-FLAG mAb. Representative of 3 independent experiments.

### Supplementary Figure 3

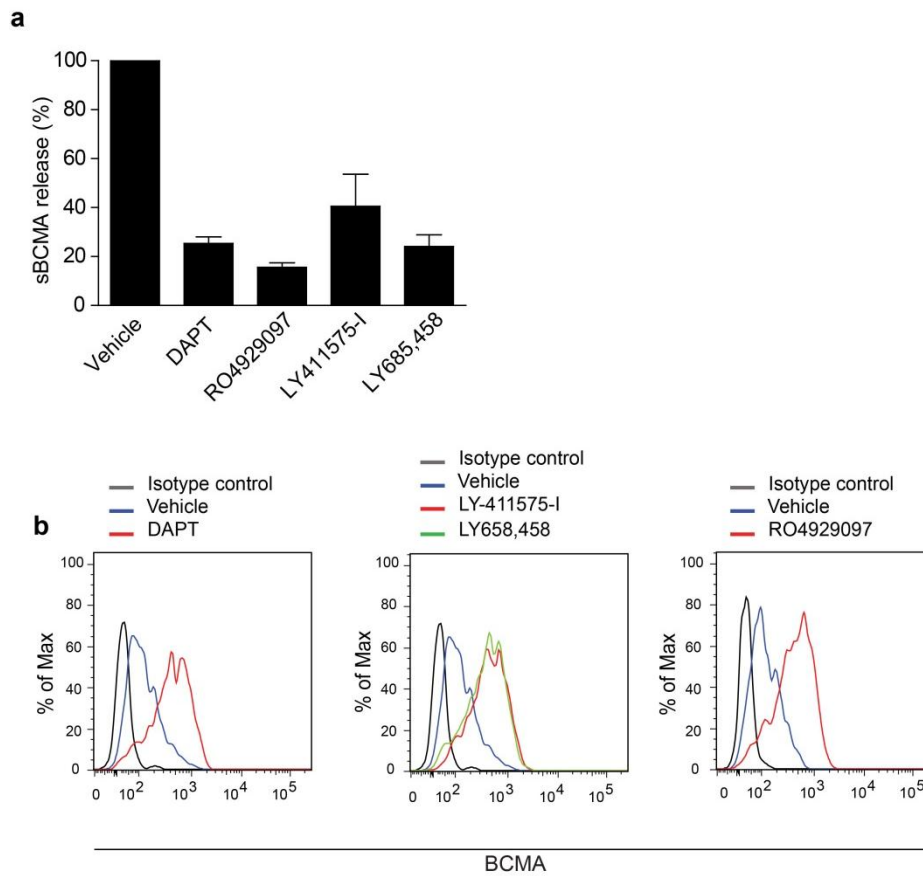

**Supplementary Figure 3. Different types of  $\gamma$ -secretase inhibitors block the release of sBCMA.** Human PBMCs were stimulated with R848 and IL-2 for 7 days and then CD19<sup>+</sup> B cells were positively selected. **(a)** After an overnight culture with the indicated  $\gamma$ -secretase inhibitors the released sBCMA in the supernatant was measured by ELISA, (mean $\pm$ s.e.m. of three experiments) **(b)** After an overnight culture with the indicated  $\gamma$ -secretase inhibitors, BCMA surface expression was determined after gating on CD19<sup>+</sup>CD38<sup>+</sup> Ig-secreting cells, which represented in this experiment about 50% of the CD19<sup>+</sup> cell population. Representative of 3 independent experiments. The concentrations of the  $\gamma$ -secretase inhibitors were DAPT 1  $\mu$ M, RO4929097 10  $\mu$ M, LY-411575-I 100 nM and LY685,458 1  $\mu$ M. Representative of 3 independent experiments, mean $\pm$ s.e.m..

## Supplementary Figure 4

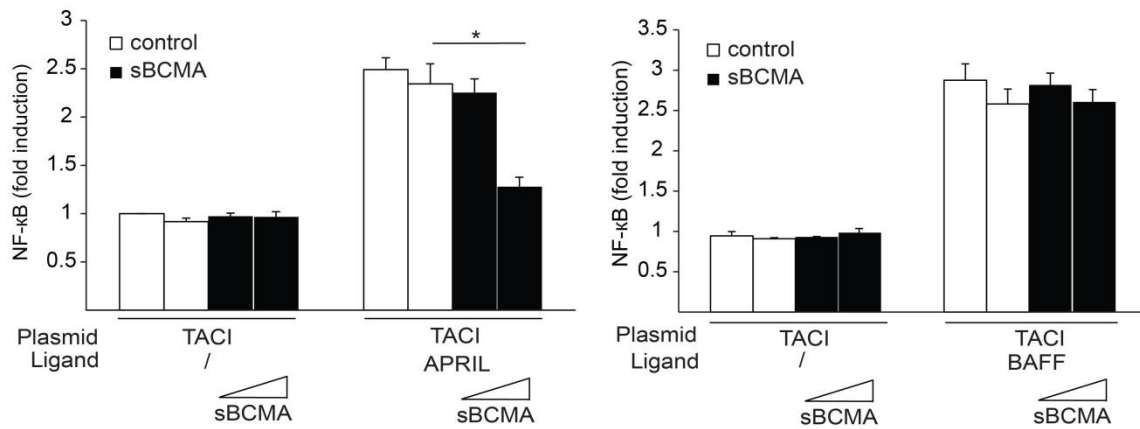

**Supplementary Figure 4. sBCMA inhibits APRIL-mediated signaling via TACI.** HEK293T cells were transfected with human TACI and activated with APRIL or BAFF as indicated. sBCMA (50 and 200 ng ml<sup>-1</sup>) was applied as indicated. sBCMA and control supernatant were obtained from HEK293T cells that had been transfected with full-length human BCMA or an empty control vector. BCMA-Fc (50 and 200 ng ml<sup>-1</sup>) was used as a positive control. Combined data of 3 independent experiments (mean±s.e.m., \*, p<0.05, paired t-test).

## Supplementary Figure 5

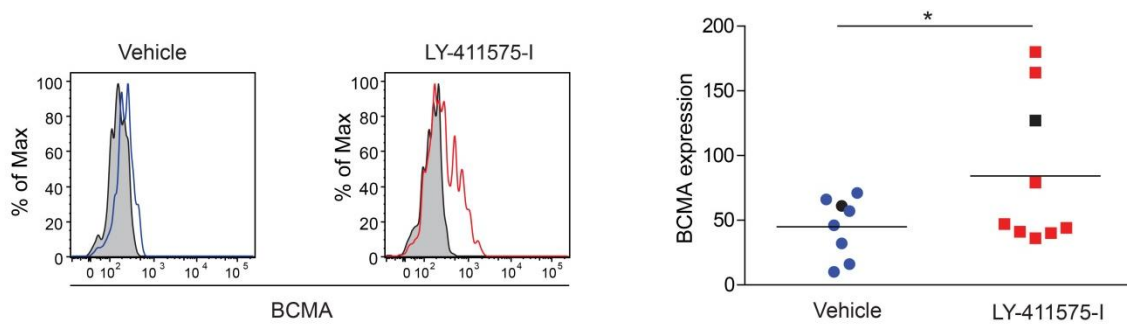

**Supplementary Figure 5. Effects of  $\gamma$ -secretase inhibitor LY-411575-I on mBCMA on plasma cells in the bone-marrow.** Immunized (OVA-LPS in alum) C57/BL6 mice were treated with the  $\gamma$ -secretase inhibitor LY-411575-I or vehicle, bone marrow was harvested and the surface display of BCMA was measured by flow cytometry. BCMA expression on gated B220<sup>+</sup>CD138<sup>+</sup> cells is shown, representative example (left) and compiled data from all 17 analyzed animals (right) (mean,  $p=0.046$  unpaired t-test). The black symbols on the right indicate the samples shown on the left. Closed histograms indicate isotype controls.

## Supplementary Figure 6

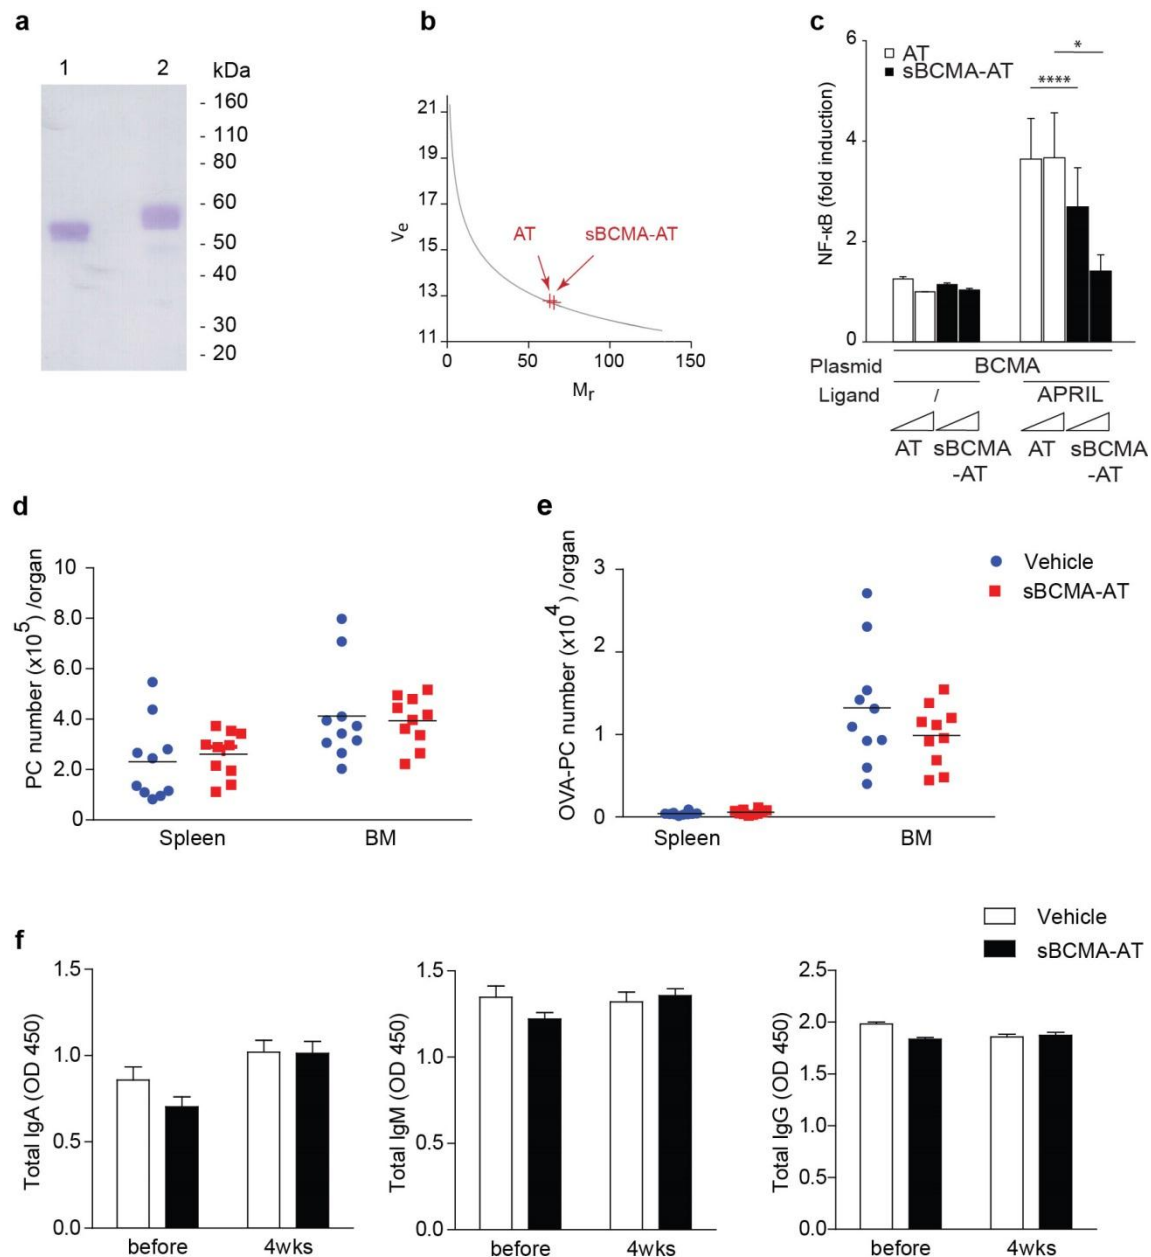

**Supplementary Figure 6. Features of recombinant sBCMA-AT.** (a) Purified AT (lane 1) and sBCMA-AT (lane 2) were separated by SDS-PAGE and stained with Coomassie. (b) AT and sBCMA-AT were analyzed by gel-filtration. (c) HEK293T cells were transfected with human BCMA and activated with mouse APRIL as indicated. sBCMA-AT (100 and 500 ng ml<sup>-1</sup>) or AT (100 and 500 ng ml<sup>-1</sup>) as a control were applied. Combined data of 5 independent experiments (mean±s.e.m, paired t-test). (d-f) 3 months old NZB/W mice were immunized intraperitoneally (OVA on alum). At 4 months, mice were treated for 4 weeks intraperitoneally with recombinant mouse sBCMA-AT resulting in a serum concentration of sBCMA-AT of 82  $\mu$ g ml<sup>-1</sup> ( $\pm$ 16  $\mu$ g ml<sup>-1</sup>). Total number of plasma cells (d), and of OVA-specific plasma cells (e) were determined in the spleen and bone marrow (BM). Immunoglobulin levels were measured by ELISA, mean±s.e.m. (f).

## Supplementary Figure 7

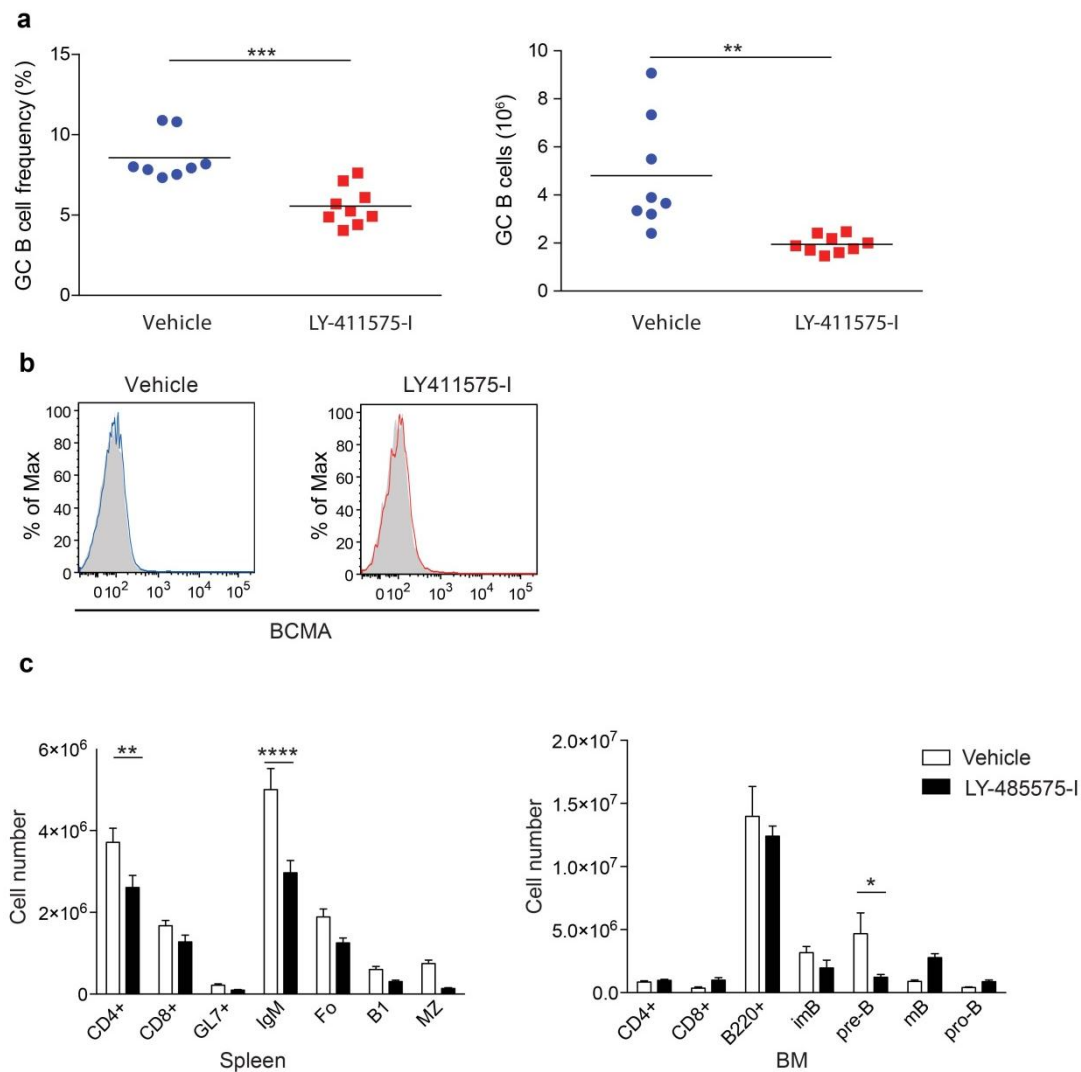

**Supplementary Figure 7. Effects of  $\gamma$ -secretase inhibition in vivo on different immune cell subsets.** (a,b) Immunized (OVA-LPS in alum) C57/BL6 mice were treated with the  $\gamma$ -secretase inhibitor LY-411575-I or vehicle. Splenocytes were harvested and germinal center B cells (Fas<sup>high</sup> CD38<sup>int</sup>) were identified by FACS. (a) Frequency of GC cells (left panel) in regard to the whole B cell population in treated and untreated mice. (unpaired t test,  $p=0.0003$ ) and absolute number of GC B cells (right panel) in treated and untreated mice (unpaired t test,  $p=0.0023$ ). (b) BCMA expression on GC B cells in treated and untreated mice. (c) NZB/W mice were treated with LY-411575-I for 7 days. Absolute number of T cells and B-cell subsets in the spleen and in the bone marrow (BM). ( $n=10$ ) mean $\pm$ s.e.m., 2way Anova, Bonferonni's multiple comparison test).

## Supplementary Figure 8

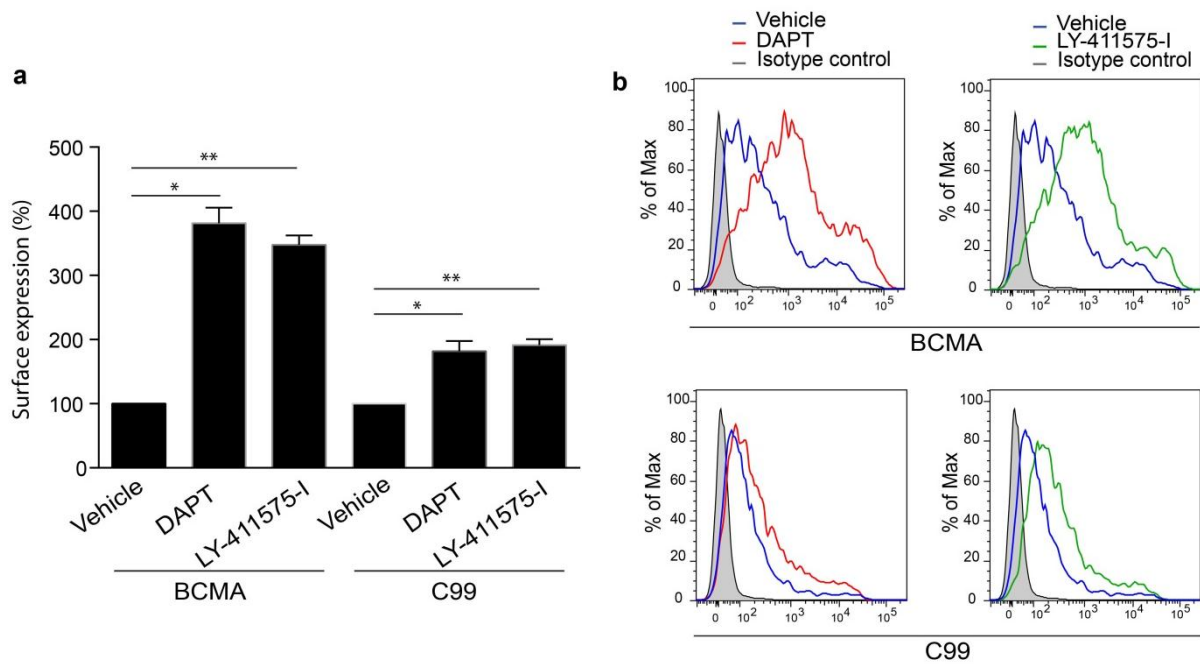

**Supplementary Figure 8. LY-411575-I inhibits shedding of BCMA and C99.** HEK293T cells were transfected with human BCMA or with the established  $\gamma$ -secretase substrate C99 and treated overnight with either DAPT (1  $\mu$ M), with LY-411575-I (100 nM) or with the appropriate vehicle. Surface expression of BCMA or C99 was measured in by flow cytometry. **(a)** Surface expression of human BCMA or C99 upon DAPT and LY-411575-I treatment. Mean $\pm$ s.e.m. of 6 replicates, \*,  $p < 0,05$ ; \*\*,  $p < 0,01$ , unpaired t-test. **(b)** Representative histograms of BCMA and C99 surface expression upon DAPT (1  $\mu$ M) and LY-411575-I (100 nM) treatment.



## Supplementary Figure 9

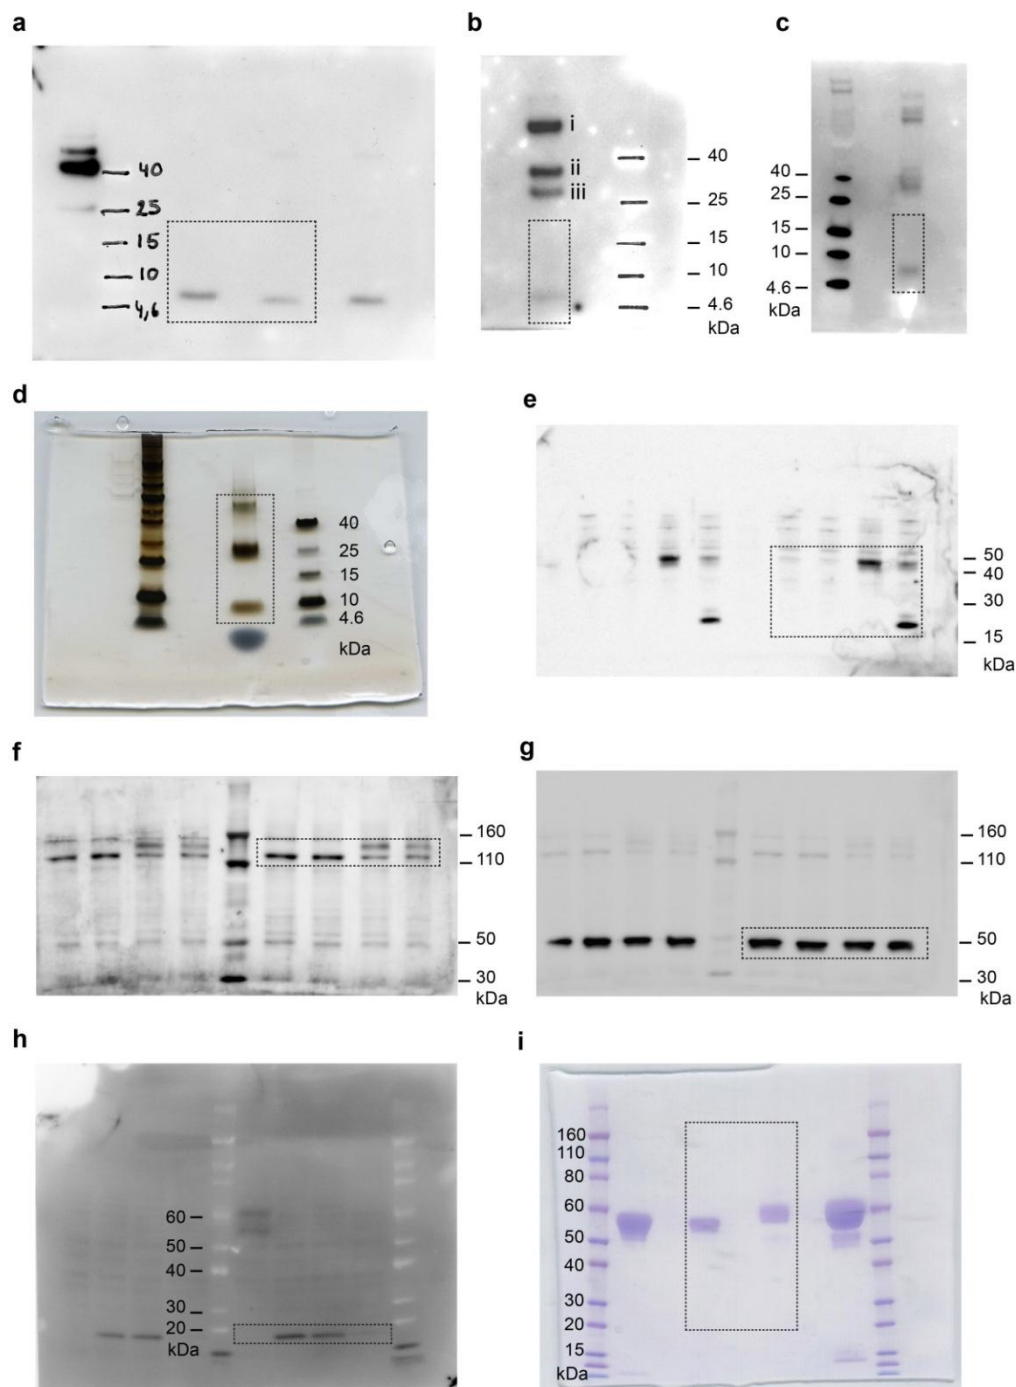

**Supplementary Figure 9. Original images of the cropped blots and gels shown in the paper.** BCMA Western blot from supernatant of plasmacytoma cells (a), serum (b), and from supernatant of human purified B cells (c) of Fig. 1f. The bands indicated in b contained : IgG heavy chain (i), complement component1 subA (ii) and IgG light chain (iii) as seen by mass-spectrometry. (d) Silver gel of immunoprecipitated sBCMA from supernatant of plasmocytoma cells, Fig. 1g. (e) PSEN1 Western blot of Fig. 4c. (f) Nicastrin Western blot of Fig. 4c (g)  $\beta$ -actin Western blot of Fig. 4c. (h) BCMA Western blot of Fig. 4c. (i) Coomassie gel of supplementary Fig. 6.a.

**Supplementary Table 1. Clinical data of patients included in this study**

| Age (year) | sex | Diagnosis | Treatment         | Related Figure          |
|------------|-----|-----------|-------------------|-------------------------|
| 52         | F   | RRMS      | GA + GCS          | Supplementary Figure 1c |
| 41         | F   | RRMS      | GA + GCS          | Supplementary Figure 1c |
| 50         | M   | RRMS      | GCS               | Supplementary Figure 1c |
| 40         | M   | RRMS      | GCS               | Supplementary Figure 1c |
| 39         | M   | RRMS      | AZA + GCS         | Supplementary Figure 1c |
| 29         | F   | RRMS      | GCS               | Supplementary Figure 1c |
| 51         | F   | RRMS      | GCS               | Supplementary Figure 1c |
| 29         | M   | RRMS      | IFN-beta 1a + GCS | Supplementary Figure 1c |
| 32         | F   | CIS       | GCS               | Supplementary Figure 1c |
| 33         | F   | RRMS      | GA + GCS          | Supplementary Figure 1c |
|            |     |           |                   |                         |
| 50         | F   | RRMS      | NTZ               | Supplementary Figure 1b |
| 33         | F   | RRMS      | NTZ               | Supplementary Figure 1b |
| 34         | M   | RRMS      | NTZ               | Supplementary Figure 1b |
| 28         | M   | RRMS      | NTZ               | Supplementary Figure 1b |
| 50         | F   | RRMS      | NTZ               | Supplementary Figure 1b |
| 56         | M   | RRMS      | NTZ               | Supplementary Figure 1b |
| 37         | F   | RRMS      | NTZ               | Supplementary Figure 1b |
| 38         | F   | RRMS      | NTZ               | Supplementary Figure 1b |
| 31         | F   | RRMS      | NTZ               | Supplementary Figure 1b |
| 56         | M   | RRMS      | NTZ               | Supplementary Figure 1b |
|            |     |           |                   |                         |
| 24         | F   | RRMS      | no treatment      | Figure 1a,b,c           |
| 26         | F   | CIS       | no treatment      | Figure 1a,b,c           |
| 28         | M   | RRMS      | no treatment      | Figure 1a,b,c           |
| 34         | F   | RRMS      | no treatment      | Figure 1a,b,c           |
| 24         | F   | CIS       | no treatment      | Figure 1a,b,c           |
| 43         | F   | CIS       | no treatment      | Figure 1a,b,c           |
| 33         | F   | RRMS      | no treatment      | Figure 1a,b,c           |
| 38         | F   | RRMS      | no treatment      | Figure 1a,b,c           |
| 32         | F   | RRMS      | no treatment      | Figure 1a,b,c           |
| 44         | F   | RRMS      | no treatment      | Figure 1a,b,c           |
| 37         | F   | CIS       | no treatment      | Figure 1a,b,c           |
| 45         | F   | RRMS      | no treatment      | Figure 1a,b,c           |
| 62         | F   | RRMS      | no treatment      | Figure 1a,b,c           |
| 51         | M   | RRMS      | no treatment      | Figure 1a,b,c           |
| 21         | F   | RRMS      | no treatment      | Figure 1a,b,c           |
| 59         | F   | RRMS      | no treatment      | Figure 1a,b,c           |
| 42         | F   | RRMS      | no treatment      | Figure 1a,b,c           |
| 40         | F   | CIS       | no treatment      | Figure 1a,b,c           |
| 21         | M   | CIS       | no treatment      | Figure 1a,b,c           |
| 33         | F   | CIS       | no treatment      | Figure 1a,b,c           |

|    |   |                  |                |               |
|----|---|------------------|----------------|---------------|
| 53 | M | RRMS             | no treatment   | Figure 1a,b,c |
| 32 | M | RRMS             | no treatment   | Figure 1a,b,c |
| 24 | F | CIS              | no treatment   | Figure 1a,b,c |
| 37 | F | RRMS             | no treatment   | Figure 1a,b,c |
| 38 | F | RRMS             | no treatment   | Figure 1a,b,c |
| 45 | F | RRMS             | no treatment   | Figure 1a,b,c |
| 24 | F | RRMS             | no treatment   | Figure 1a,b,c |
| 27 | F | RRMS             | no treatment   | Figure 1a,b,c |
| 22 | F | RRMS             | no treatment   | Figure 1a,b,c |
| 26 | F | RRMS             | no treatment   | Figure 1a,b,c |
| 62 | F | SPMS             | no treatment   | Figure 1a,b,c |
| 46 | F | SPMS             | no treatment   | Figure 1a,b,c |
| 59 | M | SPMS             | no treatment   | Figure 1a,b,c |
| 62 | M | SPMS             | no treatment   | Figure 1a,b,c |
| 39 | M | SPMS             | no treatment   | Figure 1a,b,c |
| 45 | F | SPMS             | no treatment   | Figure 1a,b,c |
| 54 | F | SPMS             | no treatment   | Figure 1a,b,c |
|    |   |                  |                |               |
| 46 | F | Neuroborreliosis | no treatment   | Figure 1b,c   |
| 69 | F | Neuroborreliosis | no treatment   | Figure 1b,c   |
| 66 | M | Neuroborreliosis | no treatment   | Figure 1b,c   |
| 55 | M | Neuroborreliosis | no treatment   | Figure 1b,c   |
| 61 | M | Neuroborreliosis | no treatment   | Figure 1b,c   |
|    |   |                  |                |               |
| 45 | F | SLE              | no treatment   | Figure 1d,e,f |
| 47 | F | SLE              | no treatment   | Figure 1d,e,f |
| 33 | F | SLE              | no treatment   | Figure 1d,e,f |
| 27 | F | SLE              | no treatment   | Figure 1d,e,f |
| 62 | F | SLE              | no treatment   | Figure 1d,e,f |
| 38 | F | SLE              | no treatment   | Figure 1d,e,f |
| 40 | F | SLE              | no treatment   | Figure 1d,e,f |
| 40 | F | SLE              | no treatment   | Figure 1d,e,f |
| 31 | F | SLE              | no treatment   | Figure 1d,e,f |
| 39 | F | SLE              | no treatment   | Figure 1d,e,f |
| 26 | F | SLE              | no treatment   | Figure 1d,e,f |
| 22 | F | SLE              | no treatment   | Figure 1d,e,f |
| 20 | F | SLE              | no treatment   | Figure 1d,e,f |
| 22 | F | SLE              | no treatment   | Figure 1d,e,f |
| 43 | F | SLE              | no treatment   | Figure 1d,e,f |
| 55 | F | SLE              | no treatment   | Figure 1d,e,f |
| 21 | F | SLE              | no treatment   | Figure 1d,e,f |
| 29 | F | SLE              | Pred, HCQ      | Figure 1d,e,f |
| 38 | F | SLE              | Pred, HCQ, AZA | Figure 1d,e,f |

|    |   |                                           |                |               |
|----|---|-------------------------------------------|----------------|---------------|
| 39 | F | SLE                                       | Pred, HCQ, CYC | Figure 1d,e,f |
| 54 | F | SLE                                       | Pred, AZA      | Figure 1d,e,f |
| 47 | F | SLE                                       | Pred, HCQ      | Figure 1d,e,f |
| 63 | F | SLE                                       | HCQ, AZA       | Figure 1d,e,f |
| 28 | F | SLE                                       | HCQ            | Figure 1d,e,f |
| 38 | F | SLE                                       | Pred           | Figure 1d,e,f |
| 36 | F | SLE                                       | Pred, MMF      | Figure 1d,e,f |
| 41 | F | SLE                                       | Pred, HCQ      | Figure 1d,e,f |
| 30 | F | SLE                                       | AZA            | Figure 1d,e,f |
| 60 | F | SLE                                       | HCQ, AZA       | Figure 1d,e,f |
| 25 | F | SLE                                       | HCQ            | Figure 1d,e,f |
| 31 | F | SLE                                       | Pred, HCQ, MMF | Figure 1d,e,f |
| 27 | F | SLE                                       | Pred, CYC      | Figure 1d,e,f |
| 45 | F | SLE                                       | Pred, HCQ, CYC | Figure 1d,e,f |
| 22 | F | SLE                                       | Pred, HCQ, CYC | Figure 1d,e,f |
| 28 | F | SLE                                       | Pred, HCQ, AZA | Figure 1d,e,f |
| 23 | F | SLE                                       | Pred           | Figure 1d,e,f |
| 25 | F | SLE                                       | Pred, CYC      | Figure 1d,e,f |
| 31 | F | SLE                                       | Pred, AZA      | Figure 1d,e,f |
| 32 | F | SLE                                       | Pred           | Figure 1d,e,f |
|    |   |                                           |                |               |
| 38 | F | OND (Sensineuronal hearing deficit)       |                | Figure 1a,b   |
| 68 | F | OND (Cerebrovascular disease)             |                | Figure 1a,b   |
| 29 | M | OND (Sensory symptoms)                    |                | Figure 1a,b   |
| 34 | F | OND (Sensory symptoms)                    |                | Figure 1a,b   |
| 45 | F | OND (Migraine)                            |                | Figure 1a,b   |
| 26 | M | OND (Sensory symptoms)                    |                | Figure 1a,b   |
| 41 | F | OND (Sensory symptoms)                    |                | Figure 1a,b   |
| 19 | F | OND (Vertigo)                             |                | Figure 1a,b   |
| 31 | M | OND (Sensory symptoms)                    |                | Figure 1a,b   |
| 35 | F | OND (Syringomyelia)                       |                | Figure 1a,b   |
| 51 | M | OND (Spinal stenosis)                     |                | Figure 1a,b   |
| 30 | F | OND (Neurasthenia)                        |                | Figure 1a,b   |
| 65 | M | OND (Alcohol-related spastic paraparesis) |                | Figure 1a,b   |
| 37 | F | OND (Sensory symptoms)                    |                | Figure 1a,b   |
| 49 | F | OND (Hearing deficit)                     |                | Figure 1a,b   |
| 53 | F | OND (Depression)                          |                | Figure 1a,b   |
| 52 | F | OND                                       |                | Figure 1a,b   |

|    |   |                  |  |             |
|----|---|------------------|--|-------------|
| 33 | F | Fatigue          |  | Figure 1b,c |
| 40 | M | Bipolar disorder |  | Figure 1b,c |
| 32 | M | Schizophrenia    |  | Figure 1b,c |

**Abbreviations used in this table:** GA: Glatiramer Acetate; GCS: Glucocorticosteroid, NTZ: Natalizumab, PRED: Prednisolon, HCQ: Hydroxychloroquine, AZA: Azathioprine, MMF: Mycophenolate mofetil, CYC: Cyclophosphamide.

**Supplementary Table 2. Antibodies used in the study**

| <b>Antibody</b>                         | <b>Source</b>  | <b>Dilution</b>                                                     |
|-----------------------------------------|----------------|---------------------------------------------------------------------|
| anti-hBCMA (C12A3.2)                    | Biogen Idec    | FC: 1 $\mu$ g ml <sup>-1</sup><br>WB: 1 $\mu$ g ml <sup>-1</sup>    |
| anti-hBCMA (A7D12.2)                    | Biogen Idec    | FC: 5 $\mu$ g ml <sup>-1</sup>                                      |
| anti-presenilin (PSEN1)                 | Epitomics      | WB: 1:2500                                                          |
| anti-nicastrin (N1660)                  | Sigma-Aldrich  | WB: 1:5000                                                          |
| anti-CD40L, FITC (TRAP1)                | BD PharMingen  | FC: 1:40                                                            |
| anti-CD138, FITC (B-A38)                | Diaclone       | FC: 1:10                                                            |
| anti-CD19, PE (HIB19)                   | BD PharMingen  | FC: 1/40                                                            |
| anti-CD19, Cy7 (HIB19)                  | Ebioscience    | FC: 1:40                                                            |
| anti-CD27, Cy7 (O323)                   | Ebioscience    | FC: 1:20                                                            |
| anti-CD38, eFluor® 450 (HB7)            | Ebioscience    | FC: 1:20                                                            |
| anti-CD138, PE (281-2)                  | BD Biosciences | FC: 1:100                                                           |
| anti-kappa, Pacific Orange (187.1)      | DRFZ           | FC: 1:50                                                            |
| anti-CD21 (7E9)                         | BioLegend      | FC: 1:100                                                           |
| anti-CD23 (B3B4)                        | BioLegend      | FC: 1:100                                                           |
| anti-CD24 (M1/69)                       | BD Biosciences | FC: 1:200                                                           |
| anti-CD93 (AA4.1)                       | BioLegend      | FC: 1:50                                                            |
| anti-CD117 (2B8)                        | BD Biosciences | FC: 1:200                                                           |
| anti-IgM (RMM-1)                        | BioLegend      | FC: 1:20                                                            |
| anti-B220 (RA3-6B2)                     | DRFZ           | FC: 1:400                                                           |
| anti-IgD (11-26c)                       | DRFZ           | FC: 1:200                                                           |
| anti-GL-7 (GL-7)                        | DRFZ           | FC: 1:200                                                           |
| anti-CD4 (GK1.5)                        | DRFZ           | FC: 1:200                                                           |
| anti-CD8 (53-6.7)                       | BioLegend      | FC: 1:50                                                            |
| anti-FLAG™ (M2)                         | Sigma-Aldrich  | FC: 5 $\mu$ g ml <sup>-1</sup><br>ELISA: 5 $\mu$ g ml <sup>-1</sup> |
| goat-anti-mouse IgG2b, Alexa Fluor® 647 | Invitrogen     | FC: 1:500                                                           |
| goat-anti-mouse Ig, PE                  | Dako           | FC: 1:50                                                            |
| goat-anti-mouse IgG, HRP (True blot®)   | Ebioscience    | WB: 1:1000                                                          |
| anti-rabbit IgG, HRP                    | Promega        | WB: 1:2500-5000                                                     |
| mouse anti-C99 (4G8)                    | Covance        | FC: 2 $\mu$ g ml <sup>-1</sup>                                      |

**Abbreviations used in this table:** WB: Western blot; FC: flow cytometry; DRFZ: Deutsches Rheuma-Forschungszentrum
